# Supplementary material
Source: Springer Nature journal article supplement (https://www.springermedizin.de/resource/supplementary/12884_2008_199_MOESM3_ESM.pdf/9459844)
Supplement: MOESM3 [file 9459844]

A kg x 100%

---

= 1 R.M.

B %
